# Supplementary material for: INPP5K and Atlastin-1 maintain the nonuniform distribution of ER–plasma membrane contacts in neurons
Source: Life Sci Alliance. 2021 Sep 23;4(11):e202101092. doi: 10.26508/lsa.202101092 (PMC8507493; doi:10.26508/lsa.202101092)
Supplement: Supplementary file 1 [file LSA-2021-01092_SdataF1.xlsx]

## Sheet: Fig 1G
Source Data for Figure 1G
Dorsal Axon/ Dendrite Fluo. Intensity (ratio)
PM	ER-PM contacts
0.700428	0.034863
0.761222	0.0517155
0.876119	0.0124816
0.856078	0.0166738
0.476909	0.0581451
1.04077	0.091766
1.27031	0.0635242
2.3188	0.0833906
1.32121	0.0646864
0.492551	0.0277998
0.602351	0.00492529
0.883896	0.0226552
1.29067	0.0242818
1.5969	0.0431531
0.75852	0.0111596
