# Supplementary material for: INPP5K and Atlastin-1 maintain the nonuniform distribution of ER–plasma membrane contacts in neurons
Source: Life Sci Alliance. 2021 Sep 23;4(11):e202101092. doi: 10.26508/lsa.202101092 (PMC8507493; doi:10.26508/lsa.202101092)
Supplement: Supplementary file 3 [file LSA-2021-01092_SdataF2.xlsx]

## Sheet: Fig 2B
Source Data for Figure 2B
Line Scan (Normalized Fluo. Intensity)
Distance	endoGFP::ESYT-2	mCherry::RAB-3
0	0	0.0346113
0.11	0	0.0351276
0.22	0	0.0366657
0.33	0	0.0373944
0.44	0	0.0372766
0.55	0	0.0390773
0.66	0	0.0414022
0.77	0	0.0490636
0.88	0	0.0595598
0.99	0	0.0699163
1.1	0	0.0857358
1.21	0	0.118798
1.32	0	0.181832
1.43	0	0.288402
1.54	0	0.379732
1.65	0	0.42863
1.76	0	0.441362
1.87	0	0.451733
1.98	0	0.497045
2.09	0	0.58695
2.2	0	0.636463
2.31	0	0.573677
2.42	0	0.426383
2.53	0	0.285147
2.64	0	0.2337
2.75	0	0.251278
2.86	0	0.277731
2.97	0	0.258954
3.08	0	0.196753
3.19	0	0.129533
3.3	0	0.0725971
3.41	0	0.048122
3.52	0	0.0472938
3.63	0	0.0570221
3.74	0	0.0794081
3.85	0	0.105923
3.96	0	0.11863
4.07	0	0.0967879
4.18	0	0.0729556
4.29	0	0.0607304
4.4	0	0.0601371
4.51	0.0165337	0.0663547
4.62	0.017567	0.0655513
4.73	0.00465009	0.0626711
4.84	0	0.0627082
4.95	0	0.0632397
5.06	0	0.061571
5.17	0	0.0591853
5.28	0	0.0562309
5.39	0.00826683	0.0510516
5.5	0.00465009	0.048431
5.61	0.0165337	0.0505819
5.72	0.00930019	0.0550814
5.83	0	0.061608
5.94	0	0.0708048
6.05	0	0.0922761
6.16	0	0.137098
6.27	0	0.205727
6.38	0	0.324167
6.49	0	0.508291
6.6	0	0.706007
6.71	0	0.834131
6.82	0	0.846198
6.93	0	0.732402
7.04	0	0.558258
7.15	0	0.386919
7.26	0.00261955	0.249891
7.37	0.00168953	0.165104
7.48	0	0.124856
7.59	0	0.115498
7.7	0	0.114995
7.81	0.00806791	0.107852
7.92	0.00810796	0.101781
8.03	0.00201633	0.112768
8.14	0	0.142872
8.25	0	0.172628
8.36	0	0.17471
8.47	0	0.147518
8.58	0	0.11239
8.69	0.00807566	0.0859716
8.8	0.0129169	0.0768602
8.91	0.027017	0.0890628
9.02	0.0364761	0.116407
9.13	0.0141337	0.141696
9.24	0	0.144322
9.35	0	0.117246
9.46	0	0.082271
9.57	0	0.0607749
9.68	0	0.0555372
9.79	0.0100507	0.0603556
9.9	0.0435094	0.065948
10.01	0.0455903	0.0670813
10.12	0.0134956	0.064325
10.23	0	0.0618948
10.34	0	0.0606723
10.45	0	0.0626652
10.56	0	0.0727563
10.67	0	0.0894299
10.78	0	0.108856
10.89	0	0.135493
11	0	0.179216
11.11	0	0.249861
11.22	0.000528302	0.334882
11.33	0.000994603	0.390038
11.44	0.00641971	0.389835
11.55	0.0356145	0.332158
11.66	0.0822033	0.250798
11.77	0.0767459	0.177992
11.88	0.0354492	0.129509
11.99	0.00788966	0.108165
12.1	0.00375237	0.10281
12.21	0.0295203	0.101706
12.32	0.0319978	0.0965911
12.43	0.0712575	0.0875143
12.54	0.384258	0.0831047
12.65	0.760759	0.0807428
12.76	0.753032	0.0756414
12.87	0.411952	0.0670831
12.98	0.128712	0.056722
13.09	0.0451085	0.0499067
13.2	0.0260961	0.0483186
13.31	0.0188277	0.0479774
13.42	0.0352877	0.0472129
13.53	0.0447869	0.0492793
13.64	0.0315031	0.0587168
13.75	0.0197164	0.0719747
13.86	0.0067633	0.0839292
13.97	0	0.0992342
14.08	0	0.11296
14.19	0.00648559	0.114411
14.3	0.17481	0.101074
14.41	0.614647	0.0810148
14.52	1	0.0649125
14.63	0.930417	0.0543134
14.74	0.561001	0.0479941
14.85	0.248027	0.0441352
14.96	0.0831837	0.0425443
15.07	0.0280956	0.0441022
15.18	0.0363805	0.0512905
15.29	0.0516677	0.0678319
15.4	0.0428842	0.0902736
15.51	0.0214421	0.10803
15.62	0.00852517	0.115052
15.73	0.00439175	0.109093
15.84	0.00852517	0.0919423
15.95	0	0.0709531
16.06	0	0.0551432
16.17	0	0.0466325
16.28	0	0.043468
16.39	0.00439175	0.0434742
16.5	0.00852517	0.043672
16.61	0	0.0429489
16.72	0	0.0418116
16.83	0	0.0406868
16.94	0	0.0414284
17.05	0.00878351	0.0469415
17.16	0.0346174	0.0628009
17.27	0.0692347	0.0927582
17.38	0.112119	0.136752
17.49	0.115994	0.197538
17.6	0.0948102	0.271853
17.71	0.0989437	0.353072
17.82	0.081635	0.449909
17.93	0.0601929	0.581407
18.04	0.0428842	0.734074
18.15	0.0258339	0.841641
18.26	0.0258339	0.831622
18.37	0.0214421	0.695439
18.48	0.00852517	0.494508
18.59	0	0.303353
18.7	0	0.166943
18.81	0.00372266	0.0887102
18.92	0.0146194	0.0534929
19.03	0.0181534	0.041421
19.14	0.00585653	0.0382686
19.25	0	0.0385477
19.36	0	0.0399924
19.47	0	0.0415329
19.58	0	0.043341
19.69	0	0.045414
19.8	0.00282881	0.0469372
19.91	0.0127038	0.0467827
20.02	0.0355797	0.0468745
20.13	0.0928223	0.0505686
20.24	0.136057	0.05993
20.35	0.0954729	0.0808837
20.46	0.0424967	0.122392
20.57	0.0123344	0.191024
20.68	0.00152678	0.293633
20.79	0	0.430351
20.9	0	0.5551
21.01	0	0.6048
21.12	0	0.56204
21.23	0	0.465045
21.34	0	0.371784
21.45	0	0.322526
21.56	0.00129557	0.312456
21.67	0.0164445	0.312107
21.78	0.0449419	0.308296
21.89	0.0410267	0.308075
22	0.028146	0.30053
22.11	0.0106629	0.275269
22.22	0	0.252323
22.33	0	0.260635
22.44	0	0.313314
22.55	0	0.411079
22.66	0	0.537004
22.77	0	0.649865
22.88	0	0.705709
22.99	0	0.686727
23.1	0.00245809	0.620831
23.21	0.00969415	0.557534
23.32	0.0107327	0.517974
23.43	0.00392416	0.471987
23.54	0	0.392525
23.65	0	0.2906
23.76	0	0.193726
23.87	0	0.121753
23.98	0	0.0776028
24.09	0	0.0549077
24.2	0	0.0479987
24.31	0	0.054921
24.42	0	0.0786831
24.53	0	0.122412
24.64	0.00965928	0.1861
24.75	0.0667159	0.261657
24.86	0.174199	0.326424
24.97	0.231523	0.350395
25.08	0.175524	0.316796
25.19	0.0731305	0.240613
25.3	0.0185797	0.156268
25.41	0	0.0941708
25.52	0	0.0603475
25.63	0	0.047491
25.74	0	0.0451612
25.85	0	0.0470599
25.96	0	0.0531799
26.07	0	0.0733267
26.18	0	0.136464
26.29	0	0.276201
26.4	0	0.4788
26.51	0	0.653382
26.62	0	0.699309
26.73	0	0.610167
26.84	0	0.461844
26.95	0	0.336768
27.06	0	0.281373
27.17	0	0.281186
27.28	0	0.286233
27.39	0.00601283	0.267766
27.5	0.0382109	0.234614
27.61	0.0845645	0.211847
27.72	0.107703	0.211015
27.83	0.0994616	0.221974
27.94	0.0854468	0.232597
28.05	0.0588069	0.245674
28.16	0.0199295	0.292148
28.27	0	0.411555
28.38	0	0.607735
28.49	0	0.819609
28.6	0	0.967712
28.71	0	1
28.82	0	0.913006
28.93	0.00223205	0.734031
29.04	0.0166538	0.503353
29.15	0.0560633	0.29113
29.26	0.146855	0.153516
29.37	0.223273	0.0845133
29.48	0.212769	0.0568759
29.59	0.114457	0.0484873
29.7	0.0358186	0.0473878
29.81	0.0117996	0.0476477
29.92	0.00892301	0.0451566
30.03	0.00945132	0.0405854
30.14	0.00602445	0.0376747
30.25	0.00548711	0.037459
30.36	0.00102302	0.038026
30.47	0.00700356	0.0392761
30.58	0.0142512	0.0412572
30.69	0.00428067	0.045706
30.8	0.00873572	0.0578326
30.91	0	0.0852772
31.02	0	0.138975
31.13	0	0.221252
31.24	0	0.33549
31.35	0	0.450933
31.46	0	0.544103
31.57	0	0.587788
31.68	0	0.58609
31.79	0	0.588609
31.9	0	0.642488
32.01	0	0.757909
32.12	0	0.876223
32.23	0	0.918415
32.34	0	0.868109
32.45	0	0.782265
32.56	0	0.707472
32.67	0	0.608942
32.78	0	0.473989
32.89	0	0.323987
33	0	0.197248
33.11	0	0.117341
33.22	0	0.0770981
33.33	0.000821516	0.0571151
33.44	0.00493685	0.0465172
33.55	0	0.0429411
33.66	0	0.0438784
33.77	0	0.0445428
33.88	0.00143636	0.0432437
33.99	0.0169354	0.0412124
34.1	0.0514171	0.0390761
34.21	0.0465319	0.0378242
34.32	0.0230296	0.0384442
34.43	0.014268	0.0399034
34.54	0.0261542	0.0428379
34.65	0.0321929	0.0476606
34.76	0.063643	0.0520859
34.87	0.137833	0.0549859
34.98	0.200022	0.0558586
35.09	0.154347	0.0563165
35.2	0.0611423	0.0614829
35.31	0.00766103	0.070217
35.42	0	0.0756272
35.53	0.00025963	0.0757078
35.64	0.00240384	0.0766887
35.75	0.00303419	0.0784158
35.86	0.00203442	0.0777863
35.97	0	0.0783098
36.08	0	0.0858934
36.19	0	0.123185
36.3	0	0.206936
36.41	0	0.308346
36.52	0	0.376966
36.63	0	0.384518
36.74	0	0.330559
36.85	0.000408175	0.253243
36.96	0.00733552	0.18938
37.07	0.0152923	0.149371
37.18	0.0162921	0.139986
37.29	0.00861559	0.155926
37.4	0	0.182917
37.51	0	0.215229
37.62	0	0.247061
37.73	0	0.266551
37.84	0	0.265094
37.95	0	0.238581
38.06	0	0.212776
38.17	0	0.229455
38.28	0	0.304764
38.39	0	0.41719
38.5	0	0.541023
38.61	0	0.633249
38.72	0	0.648633
38.83	0	0.582368
38.94	0	0.459837
39.05	0	0.321489
39.16	0	0.203891
39.27	0	0.12033
39.38	0	0.0717136
39.49	0	0.0492688
39.6	0.000311298	0.0404732
39.71	0.00994603	0.0374194
39.82	0.0327728	0.0363409
39.93	0.0459791	0.0349765
40.04	0.0358419	0.0340334
40.15	0.0134284	0.0337583
40.26	0.0296146	0.033674
40.37	0.0815291	0.0333631
40.48	0.142505	0.0333724
40.59	0.155998	0.0333266
40.7	0.148435	0.0331835
40.81	0.158492	0.032619
40.92	0.235984	0.0324499
41.03	0.3043	0.0325964
41.14	0.284091	0.0325652
41.25	0.222857	0.0327574
41.36	0.185629	0.0329923
41.47	0.111358	0.0337163
41.58	0.043512	0.0341069
41.69	0.0266825	0.0340065
41.8	0.0142835	0.0344203
41.91	0.0243226	0.036556
42.02	0.0144062	0.042082
42.13	0.0018032	0.0585468
42.24	0.00656567	0.0968846
42.35	0.0782288	0.164234
42.46	0.142656	0.242434
42.57	0.11108	0.286236
42.68	0.0463278	0.267125
42.79	0.0159266	0.192913
42.9	0.0120696	0.124229
43.01	0.0129169	0.0842095
43.12	0.00703714	0.0688606
43.23	0.00565115	0.0709639
43.34	0.00259759	0.0985772
43.45	0	0.167084
43.56	0	0.271667
43.67	0	0.399027
43.78	0	0.547613
43.89	0	0.715223
44	0	0.871067
44.11	0	0.965054
44.22	0	0.973294
44.33	0	0.951029
44.44	0	0.932117
44.55	0	0.904961
44.66	0	0.839057
44.77	0	0.706198
44.88	0	0.530014
44.99	0	0.365369
45.1	0	0.248333
45.21	0	0.179431
45.32	0	0.134896
45.43	0	0.101521
45.54	0.00494072	0.0829156
45.65	0.011261	0.0783398
45.76	0.0072154	0.0814418
45.87	0.00330157	0.0842899
45.98	0.000990728	0.0809582
46.09	0	0.0763741
46.2	0.0225362	0.0790734
46.31	0.0917037	0.0910523
46.42	0.143692	0.114321
46.53	0.146865	0.148989
46.64	0.117673	0.188477
46.75	0.0626471	0.225146
46.86	0.0224755	0.2582
46.97	0.0129169	0.294427
47.08	0.0291923	0.333446

## Sheet: Fig 2C
Source Data for Figure 2C
Normalized Fluo. Intensity (endoGFP::ESYT-2)
Dendrite	Dorsal Axon
1.6181	0
0.95849	0.144353
0.819034	0.221252
0.746059	0.327951
0.858317	0.099873
0.869775	0
0.683249	0.0623705
0.462054	0.231886
0.661299	0.0906766
1.11127	0.0502991
0.609309	0.0569628
1.72636	0.0307278
0.800261	0
0.729713	0.00726801
	0.014493

## Sheet: Fig  2F
Source Data for Figure 2F
Line Scan (Normalized Fluo. Intensity)
Distance	Reconstituted GFP	wrmScarlet::ESYT-2
0	0.034012	0.090095
0.11	0.10421	0.106213
0.22	0.164244	0.209516
0.33	0.18314	0.228544
0.44	0.195264	0.244653
0.55	0.21882	0.260771
0.66	0.263235	0.270285
0.77	0.318804	0.270285
0.88	0.410458	0.348758
0.99	0.503501	0.407355
1.1	0.571103	0.491063
1.21	0.58878	0.537146
1.32	0.545309	0.538344
1.43	0.450774	0.562391
1.54	0.356384	0.439871
1.65	0.262303	0.232814
1.76	0.168224	0.097149
1.87	0.09869	0.089158
1.98	0.045853	0.087185
2.09	0.02558	0.090095
2.2	0.01344	0.090095
2.31	0	0.152828
2.42	0.000172	0.166685
2.53	0.01225	0.118268
2.64	0.025422	0.090095
2.75	0.025064	0.132097
2.86	0.029961	0.140728
2.97	0.040711	0.125917
3.08	0.056708	0.098474
3.19	0.076318	0.090095
3.3	0.108082	0.090095
3.41	0.15109	0.090095
3.52	0.162143	0.090095
3.63	0.155189	0.138116
3.74	0.158897	0.18019
3.85	0.173086	0.183947
3.96	0.175802	0.17655
4.07	0.159154	0.168613
4.18	0.132583	0.18019
4.29	0.105925	0.18019
4.4	0.093441	0.219624
4.51	0.087771	0.273952
4.62	0.082084	0.268483
4.73	0.06653	0.226508
4.84	0.046599	0.16982
4.95	0.051847	0.240518
5.06	0.080194	0.416221
5.17	0.125891	0.50773
5.28	0.168023	0.448358
5.39	0.197516	0.325801
5.5	0.195979	0.212029
5.61	0.172478	0.143314
5.72	0.153405	0.126872
5.83	0.140397	0.18019
5.94	0.130353	0.18019
6.05	0.134509	0.20347
6.16	0.145925	0.289781
6.27	0.168592	0.423248
6.38	0.209563	0.564922
6.49	0.265081	0.588419
6.6	0.293595	0.461944
6.71	0.287865	0.36038
6.82	0.278801	0.324621
6.93	0.27927	0.270285
7.04	0.259649	0.270285
7.15	0.204058	0.234247
7.26	0.125575	0.18019
7.37	0.053633	0.18019
7.48	0.034012	0.18019
7.59	0.047093	0.18019
7.7	0.105955	0.216228
7.81	0.223678	0.342361
7.92	0.383913	0.522551
8.03	0.544148	0.666703
8.14	0.635711	0.684722
8.25	0.62263	0.558589
8.36	0.527797	0.378399
8.47	0.432965	0.234247
8.58	0.380643	0.18019
8.69	0.354482	0.18019
8.8	0.318511	0.216228
8.91	0.246569	0.270285
9.02	0.171357	0.234247
9.13	0.119035	0.144152
9.24	0.092874	0.054057
9.35	0.083064	0.036038
9.46	0.089604	0.090095
9.57	0.105955	0.090095
9.68	0.122305	0.162171
9.79	0.132115	0.270285
9.9	0.132115	0.270285
10.01	0.133072	0.306125
10.12	0.15521	0.36556
10.23	0.207426	0.383012
10.34	0.274836	0.392445
10.45	0.337551	0.36802
10.56	0.361374	0.30235
10.67	0.323527	0.259437
10.78	0.224729	0.224904
10.89	0.147328	0.152152
11	0.125637	0.091536
11.11	0.118665	0.090095
11.22	0.134189	0.090095
11.33	0.175557	0.090095
11.44	0.222481	0.107654
11.55	0.268976	0.134467
11.66	0.275311	0.125043
11.77	0.224396	0.13562
11.88	0.164795	0.202723
11.99	0.123608	0.290565
12.1	0.116579	0.361957
12.21	0.119295	0.333757
12.32	0.117236	0.243968
12.43	0.098939	0.18019
12.54	0.073728	0.163676
12.65	0.06015	0.129746
12.76	0.048741	0.162297
12.87	0.039433	0.234805
12.98	0.025875	0.225445
13.09	0.013282	0.185686
13.2	0.001311	0.213597
13.31	0.005579	0.268834
13.42	0.026694	0.270285
13.53	0.056226	0.272681
13.64	0.069781	0.287187
13.75	0.075178	0.294665
13.86	0.101043	0.324099
13.97	0.157825	0.421365
14.08	0.222792	0.486215
14.19	0.300087	0.442123
14.3	0.399485	0.422167
14.41	0.521821	0.450051
14.52	0.649288	0.527227
14.63	0.740475	0.534714
14.74	0.760233	0.520785
14.85	0.684604	0.429438
14.96	0.493941	0.312224
15.07	0.303153	0.176532
15.18	0.196191	0.157864
15.29	0.159805	0.158396
15.4	0.156672	0.18019
15.51	0.153297	0.18019
15.62	0.177699	0.189785
15.73	0.200402	0.231463
15.84	0.209316	0.277574
15.95	0.219062	0.301016
16.06	0.227488	0.277808
16.17	0.262053	0.182577
16.28	0.298758	0.102051
16.39	0.34089	0.107546
16.5	0.357914	0.214786
16.61	0.35022	0.378201
16.72	0.296372	0.494991
16.83	0.260979	0.561949
16.94	0.278791	0.421753
17.05	0.319487	0.376228
17.16	0.375195	0.422176
17.27	0.47748	0.444087
17.38	0.611121	0.543038
17.49	0.66746	0.613475
17.6	0.687292	0.538453
17.71	0.719747	0.500261
17.82	0.822989	0.406977
17.93	0.933344	0.418347
18.04	1	0.445502
18.15	0.93788	0.365704
18.26	0.807064	0.264879
18.37	0.614782	0.18019
18.48	0.487902	0.18019
18.59	0.4225	0.18019
18.7	0.357098	0.174784
18.81	0.297582	0.095501
18.92	0.335189	0.191001
19.03	0.451604	0.365786
19.14	0.594835	0.45588
19.25	0.66972	0.545975
19.36	0.632114	0.630665
19.47	0.515698	0.619853
19.58	0.370506	0.445069
19.69	0.264103	0.351767
19.8	0.289401	0.274934
19.91	0.302479	0.284592
20.02	0.335677	0.311548
20.13	0.372656	0.257419
20.24	0.405612	0.266717
20.35	0.367051	0.26196
20.46	0.35026	0.22549
20.57	0.383745	0.249563
20.68	0.433872	0.322972
20.79	0.452531	0.352343
20.9	0.368387	0.237544
21.01	0.23411	0.122745
21.12	0.124576	0.009226
21.23	0.042044	0
21.34	0.025925	0.04775
21.45	0.065144	0.155324
21.56	0.106931	0.170307
21.67	0.148631	0.18019
21.78	0.185447	0.18019
21.89	0.217691	0.210804
22	0.231685	0.237643
22.11	0.234608	0.305638
22.22	0.239605	0.341379
22.33	0.259087	0.369263
22.44	0.303282	0.402247
22.55	0.36314	0.553444
22.66	0.438529	0.722246
22.77	0.519735	0.913554
22.88	0.596424	1
22.99	0.633948	0.995802
23.1	0.66714	0.985233
23.21	0.693791	0.861362
23.32	0.688593	0.673181
23.43	0.658816	0.509343
23.54	0.590323	0.440573
23.65	0.502628	0.378921
23.76	0.406763	0.32381
23.87	0.322993	0.309746
23.98	0.267847	0.343082
24.09	0.235292	0.36038
24.2	0.221688	0.419906
24.31	0.236345	0.491909
24.42	0.281579	0.495297
24.53	0.367904	0.459899
24.64	0.494016	0.390688
24.75	0.607518	0.331216
24.86	0.674663	0.196885
24.97	0.684408	0.092609
25.08	0.567415	0.118448
25.19	0.453488	0.164919
25.3	0.410074	0.090095
25.41	0.416614	0.090095
25.52	0.446045	0.072076
25.63	0.446045	0
