# Supplementary material for: INPP5K and Atlastin-1 maintain the nonuniform distribution of ER–plasma membrane contacts in neurons
Source: Life Sci Alliance. 2021 Sep 23;4(11):e202101092. doi: 10.26508/lsa.202101092 (PMC8507493; doi:10.26508/lsa.202101092)
Supplement: Supplementary file 5 [file LSA-2021-01092_SdataFS3.xlsx]

## Sheet: Fig S3D
Source Data for Figure S3D
Total Number of Progeny
Control	cil-1	atln-1
221	0	59
214	0	27
185	0	20
233	0	20
195	0	14
223	0	47
259	0	54
229	0	28
176
264
267
245
259
218
236
205
204
213

## Sheet: Fig S3E
Source Data for Figure S3E
Average Number of Progeny
Day 1		Day 2		Day 3
Control	atln-1	Control	atln-1	Control	atln-1
65	0	101	32	55	27
68	6	95	8	51	13
50	0	86	5	49	15
57	0	115	12	61	8
54	0	93	6	48	8
61	10	108	17	54	20
73	6	126	22	60	26
78	5	98	13	53	10

## Sheet: Fig S3F
Source Data for Figure S3F
mCherry::RAB-3 Puncta Number				Total Fluo. Intensity (mCherry::RAB-3)
Control	cil-1	atln-1		Control	cil-1	atln-1
25	22	20		31.5041	13.0819	43.435
17	21	22		21.462	24.797	12.7613
21	24	19		15.4946	9.87643	12.8501
19	20	23		17.0114	23.2617	15.3864
22	24	24		13.503	15.3397	13.2522
18	23	21		8.85636	14.3205	15.8201
22	22	22		6.19374	10.6952	7.98368
25	19	20		10.8002	16.7311	6.70678
24	25	21		12.2349	20.4666	14.5347
21	22	20		25.5776	13.1404	11.5325
22	19	20		20.0967	20.6814	7.66045
20	24	23		21.1951	15.3635	13.3243
23	21	18		12.7488	9.55347	15.3362
	23	24			19.3931	16.4776
	19	26			11.0552	43.5611
		20				11.6259
		21
