# Supplementary material for: INPP5K and Atlastin-1 maintain the nonuniform distribution of ER–plasma membrane contacts in neurons
Source: Life Sci Alliance. 2021 Sep 23;4(11):e202101092. doi: 10.26508/lsa.202101092 (PMC8507493; doi:10.26508/lsa.202101092)
Supplement: Supplementary file 6 [file LSA-2021-01092_SdataF4.xlsx]

## Sheet: Fig 4C
Source Data for Figure 4C
mNeonGreen::ESYT-2 Dorsal Axon / Dendrite Fluo. Intensity (ratio)
Control	cil-1	cil-1; itr-1pB::cil-1N175A	cil-1; itr-1pB::cil-1ΔSKICH	cil-1 (my15)	cil-1; itr-1pB::cil-1ER	cil-1; itr-1pB::cil-1PM
0.0111855	0.968818	0.571878	0.182873	0.644847	0.751944	1.50095
0.290456	0.603395	0.745392	0.889183	0.174726	0.0112685	0.864192
0.00650786	1.48712	0.383318	0.173025	0.12551	0.0629437	0.724991
0.0629603	0.117564	0.193362	0.574091	0.690347	0.0496663	0.847315
0.0353648	1.92754	1.26947	0.320732	0.771898	0.00667039	0.564375
0.0562351	0.857771	0.25804	0.169345	0.154825	0.00667443	0.244034
0.0263367	0.480494	0.774175	0.923861	0.583256	0.029949	1.29776
0.0947457	0.873442	0.00799345	0.129183	0.377619	0.000712101	1.04603
0.0345744	0.333228	0.0201837	0.353214	0.191457	0.009464	1.04114
0.0780433	0.582143	0.109286	0.0754298	0.198081	0.116102	1.50321
0.388337	2.29346	3.54173	0.371807	0.351365	0.0574973	0.632838
0.037313	0.683534	0.666284	0.454925	0.590159	0.0309433	0.654467
0.0806436	0.301272	0.220768		0.150988	0.379225	0.484331
0.0790302	0.471089	0.11294		0.433607		1.19779
0.164096	0.76436	0.390289		1.41047		1.05933

## Sheet: Fig 4E
Source Data for Figure 4E
mNeonGreen::ESYT-2 Dorsal Axon / Dendrite Fluo. Intensity (ratio)
Control	cil-1	cil-1; itr-1pB::ocrl-1ER	cil-1; itr-1pB::unc-26ER	cil-1; itr-1pB::ocrl-1PM	cil-1; itr-1pB::unc-26PM
0.123363	0.276918	0.188362	0.0306901	0.0532136	0.304547
0.0967788	0.567027	0.0427742	0.0451935	0.78277	0.602375
0.0714781	0.453311	0.06758	0.0545481	0.448872	0.622952
0.106605	0.618409	0.0901556	0.105698	1.08628	0.233943
0.0747056	1.16465	0.149957	0.0109759	1.18057	0.660821
0.0752307	0.712867	0.106192	0.340381	1.30654	0.556518
0.139355	0.781225	0.187512	0.300533	0.945529	0.386247
0.169837	0.355854	0.108491	0.259788	0.566178	0.560375
0.0135249	1.03366	0.217929	0.189504	0.229206	0.542269
0.103717	1.29445	0.119664	0.273673	0.611722	1.04847
0.0535177	0.877666	0.0943326	0.155408	0.548849	0.72226
0.228645	0.790438	0.0286371	0.041489	1.33548	1.10989
0.142047	0.298593	0.228772	0.150961	0.198114	0.339698
0.231537	0.558512	0.080058	0.0792052	1.76204	0.33187
0.0740576	0.971352	0.073065	0.215046	0.317674	0.753763
	1.02079			0.232099
	0.915395
	0.799089
	0.537697
	0.783929

## Sheet: Fig 4G
Source Data for Figure 4G
Sheets / tubules (ratio)
Control	cil-1
0.01	5.16667
2.54444	5.62245
0.492228	2.73554
4.26289	3.60194
1.65842	6.67647
0	11.0244
0.719064	3.46995
0.194631	8.08955
0.695122	1.44355
1.09434	12.303
1.12092	5.09524
0.028609	0.850575
0.220264	1.23867
0.119318	5.47692
0.75	0.927273

## Sheet: Fig 4I
Source Data for Figure 4I
Dorsal Axon / Dendrite Fluo. Intensity (ratio) (ER-PM contacts)
Control	cil-1
0.131087	0.231974
0.0175973	0.195901
0.134248	0.256303
0.110714	0.293674
0.00639263	0.408868
0.0474071	0.306089
0.0468847	0.353936
0.0375896	0.134424
0.0302971	0.366694
0.0731469	0.670991
0.0839602	0.222377
0.0603182	0.269372
0.0227272	0.108418
0.0386595	0.0713476
0.0759461	0.155734
