# Supplementary material for: INPP5K and Atlastin-1 maintain the nonuniform distribution of ER–plasma membrane contacts in neurons
Source: Life Sci Alliance. 2021 Sep 23;4(11):e202101092. doi: 10.26508/lsa.202101092 (PMC8507493; doi:10.26508/lsa.202101092)
Supplement: Supplementary file 7 [file LSA-2021-01092_SdataFS4.xlsx]

## Sheet: Fig S4C
Source Data for Figure S4C
mNeonGreen::ESYT-2 Total Fluo. Intensity (Control)
Zone A	Zone B	Zone C
3.51567	4.34245	0.0393246
2.48161	1.45491	0.7208
4.72263	2.04888	0.0307342
10.0648	10.6076	0.633683
14.6952	5.86949	0.519694
16.0213	4.2574	0.900962
16.4707	9.23052	0.433783
6.74693	2.00884	0.639242
8.32578	7.92791	0.287859
11.839	6.48828	0.923951
3.51905	2.94094	1.36658
7.99037	3.52062	0.298145
14.8182	9.51764	1.195
12.9083	9.16612	1.02015
9.07929	3.34055	1.48987
mNeonGreen::ESYT-2 Total Fluo. Intensity (cil-1)
Zone A	Zone B	Zone C
6.94889	9.07732	6.7322
4.92499	5.02876	2.97172
4.09778	4.73609	6.09388
8.07473	5.34094	0.949301
3.84768	10.0673	7.41658
11.2105	11.5436	9.61601
9.4657	11.825	4.54821
10.2471	9.00885	8.95023
13.7759	13.2278	4.59051
6.72089	14.5364	3.91252
2.89201	4.47521	6.63272
5.72218	12.7648	3.9113
11.4204	19.7014	3.44064
9.78481	15.8304	4.60951
3.5525	10.9471	2.71539
mNeonGreen::ESYT-2 Total Fluo. Intensity (cil-1; itr-1pB::cil-1_N175A)
Zone A	Zone B	Zone C
2.97127	7.64107	1.6992
2.29143	1.62858	1.70801
11.6072	6.91378	4.44925
1.09091	1.81923	0.210941
11.5117	19.5185	14.6137
10.3494	5.37068	2.67056
12.0254	14.8447	9.30977
13.5587	15.6298	0.108381
7.75121	7.02184	0.156448
16.6081	6.62827	1.81503
2.59152	9.70422	9.17845
4.63115	7.09428	3.08566
1.80823	3.91377	0.399199
18.0796	10.5926	2.04191
7.63173	6.50049	2.97858
mNeonGreen::ESYT-2 Total Fluo. Intensity (cil-1; itr-1pB::cil-1_ΔSKICH)
Zone A	Zone B	Zone C
3.13881	1.3317	0.574002
0.906001	1.4044	0.805601
3.3267	3.2084	0.5756
3.64558	4.62519	2.09289
0.682502	0.784002	0.2189
6.31019	6.65017	1.0686
5.59	15.6724	5.16438
1.9631	1.1083	0.253599
8.0761	8.11418	2.8526
3.45619	3.2471	0.2607
3.07981	3.54208	1.14509
2.90751	2.96999	1.3227
mNeonGreen::ESYT-2 Total Fluo. Intensity (cil-1(my15))
Zone A	Zone B	Zone C
8.09584	12.36	5.22058
4.4402	2.99637	0.775818
6.85725	6.84945	0.860654
8.73145	17.7113	6.02773
5.80193	12.186	4.4785
3.83484	8.27634	0.59373
4.05507	9.88531	2.36514
5.12677	8.55375	1.93597
9.37149	11.4561	1.79424
4.93178	7.65336	0.976894
3.41892	5.03885	1.20129
3.40132	7.77363	2.00732
10.7956	10.3438	1.63001
15.5307	25.8299	6.73423
3.56374	6.50523	5.02657
mNeonGreen::ESYT-2 Total Fluo. Intensity (cil-1; itr-1pB::cil-1_ER)
Zone A	Zone B	Zone C
2.17143	3.62106	1.63279
0.362071	0.061152	0.00408
0.243551	0.0659067	0.01533
3.44879	2.33038	0.171289
3.13887	4.47466	0.0209375
0.593309	0.661344	0.00396
1.64065	0.742433	0.0491357
6.74061	1.96231	0.0048
3.56107	3.36189	0.033702
3.60963	1.79936	0.419085
0.377755	0.168428	0.0217199
0.720228	1.64466	0.0222863
1.37344	2.08327	0.520844
mNeonGreen::ESYT-2 Total Fluo. Intensity (cil-1; itr-1pB::cil-1_PM)
Zone A	Zone B	Zone C
1.01858	3.9711	1.52883
2.25592	6.09997	1.94955
7.35656	4.75179	5.33344
5.4087	5.00287	4.58287
7.77873	7.11384	4.39012
8.39147	5.91133	2.0478
3.75814	3.44221	4.87715
7.05262	9.71618	7.37725
2.75275	10.8751	2.86601
5.77001	14.5805	8.67352
1.46652	2.94199	0.92807
6.49347	5.33828	4.24976
15.1824	5.62505	7.35329
1.46882	3.57918	1.75934
0.950455	0.801019	1.00684

## Sheet: Fig S4E
Source Data for Figure S4E
PM/Cytoplasm Fluo. Intensity (ratio) (iRFP-PHPLCδ1)
mScarlet-I_PM	mScarlet-OCRL-1_PM	mScarlet-UNC-26_PM
2.91991	1.03322	1.39127
1.38536	0.926795	1.40387
2.11273	0.925466	1.12806
2.70766	1.36232	1.67886
1.73182	1.27703	1.16307
2.07168	1.45099	1.30463
1.85886	1.0982	1.22715
2.31267	1.03288	1.74445
1.56248	0.985433	1.35268
2.19216	1.00994	1.18494
1.69268	1.54567	1.39628
1.91496	1.04309	1.11515
2.12349	0.970777	1.67748
1.86987	1.01737	1.41449
1.59566	1.04988	1.24956
2.17349	1.04032	1.17231
1.5726	0.88845	1.51794
1.75444	1.26258	1.41586
1.51792	1.18276	1.9336
1.70037	1.19267	1.28828

## Sheet: Fig S4G
Source Data for Figure S4G
PM/Cytoplasm Fluo. Intensity (ratio) (iRFP-PHPLCδ1)
EGFP	OCRL-1_ER-EGFP	UNC-26_ER-EGFP
2.1302	1.41185	1.9982
1.59301	2.1243	2.34191
2.4312	2.68007	2.05075
1.33852	1.58012	1.88784
1.6562	1.94802	1.64129
2.56528	1.84511	2.47783
1.67324	1.63238	2.06913
1.95627	2.18532	1.99574
2.08958	2.03985	2.09272
1.5207	1.74204	1.5546
1.95163	1.61496	1.83539
1.84607	2.04717	1.51805
2.23699	1.63576	2.07794
2.39082	1.84988	3.19483
1.5038	1.81438	1.63168
1.52666	2.3447	1.45611
2.29968	1.45028	2.05809
1.80543	1.62839	1.70209
1.56914	1.52608	1.86935
1.72812	2.16015	1.67992
