# Supplementary material for: INPP5K and Atlastin-1 maintain the nonuniform distribution of ER–plasma membrane contacts in neurons
Source: Life Sci Alliance. 2021 Sep 23;4(11):e202101092. doi: 10.26508/lsa.202101092 (PMC8507493; doi:10.26508/lsa.202101092)
Supplement: Supplementary file 8 [file LSA-2021-01092_SdataF5.xlsx]

## Sheet: Fig 5B
Source Data for Figure 5B
mNeonGreen::ESYT-2 Total Fluo. Intensity
Zone A	Zone B	Zone C
0.337832	0.278179	0.018029
0.569668	2.05918	4.41154
0.996556	1.84803	2.95676
1.9671	18.9693	5.14141
2.3814	6.20233	8.94408
2.18901	7.76106	4.893
3.59334	9.10428	1.38255
2.02917	9.44962	8.68259
5.34493	10.1826	5.44754
1.33887	7.75586	1.06746
1.13183	9.63306	2.6211
1.47656	8.16447	4.85512
2.14678	14.3073	1.56876
0.954326	3.47984	0.464398
0.02541	0.766535	0.144353
1.30487	7.35184	1.22428
1.95669	5.28867	0.880034
2.80805	4.59449	4.03583

## Sheet: Fig 5D
Source Data for Figure 5D
Dorsal Axon / Dendrite Fluo. Intensity (ratio) (ER-PM contacts)
Control	atln-1
0.184212	0.268074
0	0.496675
0	0.319086
0.0755193	0.284572
0.02176	0.165544
0.203305	0.153124
0.0615614	0.682922
0.0775905	0.299267
0.118889	0.337097
0.0166301	0.167997
0.0692548	0.0520308
0.0206994	0.175823
0.185417	0.0784749
0.100805	0.500404
0.0352752	0.192031
0.175582	1.14449
0.0109747	0.270284
0.053325	0.173972
0.105022	0.223436
0.140139	0.153119
0.186614	0.123433
	0.227611
	0.841719
	0.37
	0.284251
	0.29697
	0.133273
	0.161916
	0.375708
	0.506877
	0.582052

## Sheet: Fig 5F
Source Data for Figure 5F
mNeonGreen::ESYT-2 Dorsal Axon / Dendrite Fluo. Intensity (ratio)
Control	cil-1	atln-1	atln-1; cil-1	cil-1; itr-1pB::atln-1	atln-1; itr-1pB::cil-1
0.187	0.544011	0.053367	0.713	0.101	1.9252
0.322	3.76979	2.96698	2.603	0.031	0.270334
0.015	0.813103	2.6137	0.359	0.012	1.84837
0.023	3.47471	3.75581	2.133	0.152	4.73754
0	0.338233	2.23526	1.316	0.429	4.05658
0.019	1.40494	0.384753	1.528	0.264	1.53912
0.014	0.522677	4.27889	1.11	0.025	1.61264
0.11	0.805616	1.0192	0.006	0.001	0.860496
0.091	0.683959	0.797289	1.79	0.011	2.01247
0.25	0.71866	2.3158	1.633	0.018	3.67116
0.776	1.38785	3.28812	0.57		2.27643
0.109	0.847141	0.730751	0.881		1.3114
0.042	0.356787	0.486624	1.141		4.58539
0.195	0.935851	5.68095	1.727
0.241	0.94473	0.938242
0.439		0.449756
0.363		1.43724
0.07		1.09964
0.053
0.015
0.235
0.181
0.165
0.152
0.132
0.268

## Sheet: Fig 5G
Source Data for Figure 5G
mNeonGreen::ESYT-2 occupancy in dendrite (µm)
Control	cil-1	atln-1	atln-1; cil-1	cil-1; itr-1pB::atln-1	atln-1; itr-1pB::cil-1
53.185	56.43	29.81	31.46	53.24	26.46
56.925	47.2	13.64	34.98	52.69	78.631
56.045	41.1437	40.92	45.76	59.73	20.707
54.725	50.82	37.8	34.49	62.04	37.545
57.805	31.46	13.186	44.55	64.24	30.193
60.665	24.54	20.783	23.87	66	22.237
63.745	47.97	25.63	18.5898	67.54	46.11
56.045	59.4	43.45	27.39	56	10.995
69.025	51.37	37.05	14.52	55	33.357
57.365	66.56	12.76	16.5	56.23	26.19
60.445	44.79	15.73	35.64		28.05
65.065	32.34	17.05	43.67		54.57
50.985	45.32	24.53	44.87		33.21
58.025	47.08	11.3	39.04
55.385	39.72	22.0042
70.127		29.92
65.505		16.72
44.165		14.67
44.272
56.045
59.3
53.9
49.06
62.92
70.4
52.58

## Sheet: Fig 5I
Source Data for Figure 5I
Sheets / tubules (ratio)
Control	cil-1	atln-1	cil-1; itr-1pB::atln-1
1.26908	12.625	3.13726	2.77778
0.658031	5.42857	2.53261	2.53593
0.873077	6.23077	1.63529	2.57954
0.298507	2.07317	3.17901	1.00234
0.742547	3.10811	1.19024	0.487047
0.493243	0.913043	0.30662	0.66087
1.1783	2	0.267101	3.19403
0.357798	5.68571	4.82	6.84615
0.605839	1.73913	2.58416	0.466667
0.227045	5.0303	1.96875	0.327869
0.787234	2.2	0.886364	1.12315
0.425806	8.18182	1.01159	1.34637
0.201493	0.351351	3.87234	0.783505
1.21198		5.57447	0.545455
		9.9	0.204955
		4.62857
		0.866412
