# Supplementary material for: INPP5K and Atlastin-1 maintain the nonuniform distribution of ER–plasma membrane contacts in neurons
Source: Life Sci Alliance. 2021 Sep 23;4(11):e202101092. doi: 10.26508/lsa.202101092 (PMC8507493; doi:10.26508/lsa.202101092)
Supplement: Supplementary file 12 [file LSA-2021-01092_SdataF7.xlsx]

## Sheet: Fig 7D
Source Data for Figure 7D
Axon length (µm) 24 hours post axotomy
Control	esyt-2	jph-1
61.7	131.414	137.069
143.35	125.952	113.1
104.239	130.08	103.28
116.391	171.247	133.76
121.018	79.026	116.5
118.67	153.054	110.68
148.027	131.315	94.15
181.972	173.134	74.4
204.549	128.686	110.03
126.72	141.864	122.3
154.565	146.159	102.09
175.702	157.221	122.881
144.906	135.222	109.802
125.165	106.104	136.73
130.112		75
149.268
159.825
168.977
125.165
130.112
149.268
159.825
168.977
168.555
180.085
113.231
107.99
168.687
126.609
168.525
149.638
126.364
161.5
175.826
121.828
132.334
126.692

## Sheet: Fig 7E
Source Data for Figure 7E
Axon length (µm) 48 hours post axotomy
Control	esyt-2	jph-1
205.634	176.881	121.05
188.8	183.45	156.416
217.755	165.568	198.572
162.759	182.464	114.62
189.117	154.267	106.57
175.13	166.342	140.68
141.134	218.116	159.97
148.346	167.432	148.38
193.746	225.478	189.8
156.532	161.938	85.53
263.9	189.5	143.66
184.346		171.43
209.797		140.85
202.627		200.38
228.778		146.22
93.719		196.73
113.522		155.71
197.68
173.2
175.992
180.273
187.337
184.047
224.778
212.397
182.418
200.386
129.727
232.389
178.182
214.443
205.917
175.449
211.64
134.199
160.16
153.228

## Sheet: Fig 7F
Source Data for Figure 7F
Axon length (µm) 24 hours post axotomy
Control	cil-1	cil-1; itr-1Pb::cil-1	atln-1	atln-1; itr-1pB-atln-1	cil-1; itr-1pB::atln-1
61.7	31.02	122.55	90.827	151.456	117.81
143.35	134.102	124.332	120.934	113.41	105.49
104.239	137.861	181.453	114.829	107.797	91.74
116.391	36.072	155.206	118.703	117.355	63.8
121.018	96.077	108.197	88.542	155.65	98.1199
118.67	112.862	141.756	123.908	116.598	172.81
148.027	31.423	130.629	138.611	166.759	129.03
181.972	146.66	121.641	109.29	74.7279	136.51
204.549	95.013	175.36	78.235	70.5094	97.57
126.72	84.45		114.414	105.6	119.679
154.565	117.425		127.887	102.519	128.48
175.702	130.605		141.193	189.741	113.96
144.906	74.174		112.621	185.5	153.89
125.165	94.808		109.333	110.33	123.09
130.112	109.61		116.707	130.929	150.58
149.268	124.55		98.091		151.02
159.825	116.036				134.64
168.977	56.268
125.165	42.043
130.112	92.897
149.268	32.664
159.825	79.178
168.977	59.83
168.555	82.937
180.085	40.839
113.231	73.993
107.99	96.455
168.687	108.378
126.609	114.863
168.525	109.693
149.638	30.586
126.364	100.676
161.5	164.336
175.826	145.784
121.828	133.162
132.334	85.669
126.692	114.315

## Sheet: Fig 7G
Source Data for Figure 7G
Axon length (µm) 48 hours post axotomy
Control	cil-1	cil-1; itr-1Pb::cil-1	atln-1	atln-1; itr-1pB-atln-1	cil-1; itr-1pB::atln-1
205.634	122.596	266.534	178.369	138.93	173.029
188.8	131.218	150.11	186.173	192.278	193.6
217.755	70.062	152.989	125.135	166.2	167.72
162.759	176.751	192.695	150.822	215.378	258.28
189.117	159.563	141.537	97.002	165.11	235.82
175.13	127.459	106.48	93.503	242.77	171.266
141.134	147.26	147.161	142.713	149.6	70.839
148.346	141.537	170.193	108.681	122.635	210.1
193.746	182.025	156.466	99.383	197.12	179.85
156.532	155.509		109.661	178.419
263.9	125.34		143.658	246.063
184.346			132.974	155.968
209.797			134.865	238.033
202.627			170.539
228.778			142.348
93.719			154.524
113.522			210.752
197.68			187.516
173.2			105.284
175.992			123.75
180.273			130.679
187.337			200.3
184.047
224.778
212.397
182.418
200.386
129.727
232.389
178.182
214.443
205.917
175.449
211.64
134.199
160.16
153.228
